# Supplementary material
Source: PubMed Central journal article supplement (PMC2742800)
Supplement: 90591.2008_2.pdf [file 90591.2008_2.pdf]

**Supplement Table 1.** Comparison of mean values for the 28 days hypoxic and the 2 days regression time point. Cells highlighted in light grey indicate those means which have a p-value between 0.01 and 0.05 and the darker grey are for those with p-values <0.01

|                              | Gene               | Estimate of difference | St Error | p-value |
|------------------------------|--------------------|------------------------|----------|---------|
| Chemokines and receptors     | C5                 | 2.15                   | 0.74     | 0.01    |
|                              | C5R1               | 0.94                   | 0.68     | 0.18    |
|                              | CCL2/MCP-1         | 1.14                   | 0.63     | 0.08    |
|                              | CCR2               | 0.63                   | 0.78     | 0.43    |
|                              | CCL4/MIP-1 $\beta$ | 0.16                   | 0.63     | 0.80    |
|                              | CCL5/RANTES        | 0.06                   | 0.46     | 0.90    |
|                              | CCR5               | -1.35                  | 0.41     | <.01    |
|                              | CXCL12/SDF-1       | 1.52                   | 0.47     | <.01    |
|                              | CXCR4              | 1.13                   | 0.63     | 0.09    |
|                              | FIZZ-1             | 0.52                   | 0.70     | 0.46    |
|                              | IL-1 $\alpha$      | 1.93                   | 1.02     | 0.07    |
|                              | IL-6               | 0.46                   | 0.87     | 0.60    |
|                              | IL-6R              | 0.57                   | 0.97     | 0.56    |
|                              | TLR-4              | 0.19                   | 0.51     | 0.71    |
| TRAIL                        | 0.92               | 0.62                   | 0.15     |         |
| Adhesion molecules           | ICAM-1             | 1.16                   | 0.53     | 0.04    |
|                              | Osteopontin        | 0.84                   | 0.53     | 0.13    |
|                              | VCAM-1             | 0.24                   | 0.33     | 0.48    |
| Cell differentiation         | 5-LO               | 0.18                   | 0.84     | 0.83    |
|                              | Endothelin-1       | 1.39                   | 0.56     | 0.02    |
|                              | ET-A receptor      | 0.97                   | 0.47     | 0.05    |
|                              | ET-B receptor      | 0.09                   | 0.69     | 0.89    |
|                              | FLAP               | 2.17                   | 0.74     | 0.01    |
|                              | TGF- $\beta$ 1     | 2.57                   | 0.71     | <.01    |
| Growth factors               | VEGF-A             | 1.30                   | 0.32     | <.01    |
| Fibrosis associated proteins | TIMP-1             | 2.32                   | 0.33     | <.01    |
|                              | MMP-2              | 0.45                   | 0.65     | 0.49    |
