# Supplementary material
Source: PubMed Central journal article supplement (PMC2742800)
Supplement: 90591.2008_3.pdf [file 90591.2008_3.pdf]

Supplement Table 2: Inflammatory genes whose expression in 3d hypoxia is equal to or greater than 1.5 fold compared to normoxia in lungs. Analysis was performed using@Genespring 10.0 Software.

| Gene Symbol       | Gene Title                                                  | Entrez Gene | Fold Increase |
|-------------------|-------------------------------------------------------------|-------------|---------------|
| Spp1              | secreted phosphoprotein 1                                   | 25353       | 1.45          |
| Lum               | lumican                                                     | 81682       | 3.02          |
| Acads             | acyl-Coenzyme A dehydrogenase, short chain                  | 64304       | 1.71          |
| Cxcr7             | chemokine (C-X-C motif) receptor 7                          | 84348       | 1.64          |
| Ccl2              | chemokine (C-C motif) ligand 2                              | 24770       | 2.53          |
| Lox               | lysyl oxidase                                               | 24914       | 1.55          |
| Nr3c1             | nuclear receptor subfamily 3, group C, member 1             | 24413       | 1.70          |
| Adamts1           | a disintegrin-like and metalloproteinase                    | 79252       | 1.74          |
| Gc                | group specific component                                    | 24384       | 1.49          |
| Serpinb2          | serine (or cysteine) peptidase inhibitor, clade B, member 2 | 60325       | 18.08         |
| Serpine1          | serine (or cysteine) peptidase inhibitor, clade E, member 1 | 24617       | 1.51          |
| Mmp12             | matrix metalloproteinase 12                                 | 117033      | 2.27          |
| Emb               | embigin                                                     | 114511      | 2.04          |
| Pawr              | PRKC, apoptosis, WT1, regulator                             | 64513       | 1.51          |
| C9                | complement component 9                                      | 117512      | 1.60          |
| Cxcl2             | chemokine (C-X-C motif) ligand 2                            | 114105      | 2.04          |
| Birc5             | baculoviral IAP repeat-containing 5                         | 64041       | 2.46          |
| Lmnb1             | lamin B1                                                    | 116685      | 1.64          |
| Ghr               | growth hormone receptor                                     | 25235       | 1.64          |
| Bmp2              | bone morphogenetic protein 2                                | 29373       | 3.15          |
| Inhba             | inhibin beta-A                                              | 29200       | 4.39          |
| RT1-Aw2           | RT1 class Ib, locus Aw2                                     | 24737       | 2.09          |
| Grem1             | gremlin 1                                                   | 50566       | 2.82          |
| Bcl2l1            | Bcl2-like 1                                                 | 24888       | 4.16          |
| Il7               | interleukin 7                                               | 25647       | 2.02          |
| Il13ra2           | interleukin 13 receptor, alpha 2                            | 171060      | 1.56          |
| Tnfsf11           | tumor necrosis factor (ligand) superfamily, member 11       | 117516      | 2.51          |
| Selp              | selectin, platelet                                          | 25651       | 5.97          |
| Nrxn1             | neurexin 1                                                  | 60391       | 1.48          |
| Wisp2             | WNT1 inducible signaling pathway protein 2                  | 29576       | 1.50          |
| Mcpt8             | mast cell protease 8                                        | 29269       | 1.85          |
| Ereg              | epiregulin                                                  | 59325       | 1.46          |
| Slc4a1            | solute carrier family 4 (anion exchanger), member 1         | 24779       | 1.99          |
| Avpr1a            | arginine vasopressin receptor 1A                            | 25107       | 1.50          |
| Il8rb             | interleukin 8 receptor, beta                                | 29385       | 1.47          |
| Serpin2           | serine (or cysteine) peptidase inhibitor, clade I, member 2 | 171149      | 2.31          |
| Nell2             | NEL-like 2 (chicken)                                        | 81734       | 5.65          |
| Fbn2              | fibrillin 2                                                 | 689008      | 2.78          |
| RT1-Db1           | RT1 class II, locus Db1                                     | 294270      | 2.30          |
| Gpc2              | glypican 2 (cerebroglycan)                                  | 171517      | 1.46          |
| Calca             | calcitonin/calcitonin-related polypeptide, alpha            | 24241       | 1.80          |
| Ms4a2             | membrane-spanning 4-domains, subfamily A, member 2          | 25316       | 2.07          |
| Bcl2l11           | BCL2-like 11 (apoptosis facilitator)                        | 64547       | 1.49          |
| Egfr              | epidermal growth factor receptor                            | 24329       | 1.52          |
| Rsad2             | radical S-adenosyl methionine domain containing 2           | 65190       | 1.75          |
| Col12a1           | procollagen, type XII, alpha 1                              | 25683       | 2.00          |
| Il6st             | interleukin 6 signal transducer                             | 25205       | 1.63          |
| Cebpg             | CCAAT/enhancer binding protein (C/EBP), gamma               | 25301       | 1.90          |
| Ptprf             | protein tyrosine phosphatase, receptor type, F              | 360406      | 1.80          |
| Il1a              | interleukin 1 alpha                                         | 24493       | 1.64          |
| Nid1              | Nidogen 1                                                   | 25494       | 1.46          |
| Ak3l1             | adenylate kinase 3-like 1                                   | 29223       | 1.84          |
| Dld               | dihydropyrimidine dehydrogenase                             | 298942      | 1.50          |
| Mustn1            | musculoskeletal, embryonic nuclear protein 1                | 290553      | 2.17          |
| Anln              | anillin, actin binding protein (scraps homolog, Drosophila) | 307056      | 1.72          |
| Ccne1             | cyclin E1                                                   | 25729       | 1.78          |
| Racgap1_predicted | Rac GTPase-activating protein 1 (predicted)                 | 315298      | 1.61          |
| Lmnb1             | Lamin B1                                                    | 116685      | 1.47          |
| Reln              | reelin                                                      | 24718       | 1.50          |
| Nrtn              | neurturin                                                   | 84423       | 3.08          |

|                        |                                                                                                        |                     |      |
|------------------------|--------------------------------------------------------------------------------------------------------|---------------------|------|
| Dock7                  | dedicator of cytokinesis 7                                                                             | 313388              | 1.57 |
| Vezt                   | vezatin, adherens junctions transmembrane protein                                                      | 299738              | 1.81 |
| Adamts7_predicted      | a disintegrin-like and metallopeptidase                                                                | 315879              | 1.52 |
| Timp3                  | tissue inhibitor of metalloproteinase 3                                                                | 25358               | 1.57 |
| Lilrb4 /// LOC499078   | leukocyte immunoglobulin-like receptor, subfamily B, member 4                                          | 292594 /// 499078   | 1.60 |
| Il17b                  | interleukin 17B                                                                                        | 116472              | 2.45 |
| Hrc                    | histidine rich calcium binding protein                                                                 | 292905              | 1.51 |
| Ica11                  | islet cell autoantigen 1-like                                                                          | 316432              | 1.57 |
| Chia                   | chitinase, acidic                                                                                      | 113901              | 2.91 |
| Aspn                   | asporin                                                                                                | 306805              | 2.13 |
| Robo2                  | roundabout, axon guidance receptor, homolog 2 (Drosophila)                                             | 84409               | 1.65 |
| Adam9                  | a disintegrin and metallopeptidase domain 9 (meltrin gamma)                                            | 290834              | 1.49 |
| RGD1564327_predicted   | similar to integrin alpha 8 (predicted)                                                                | 364786              | 1.60 |
| RGD1560732_predicted   | similar to LIM and senescent cell antigen-like domains 1 (predicted)                                   | 499443              | 2.24 |
| Pdk2                   | pyruvate dehydrogenase kinase, isoenzyme 2                                                             | 81530               | 1.50 |
| Kng1 /// Kng2 ///      | kininogen 1 /// kininogen 2                                                                            | 24903 /// 25087 /// | 1.96 |
| Hif1a                  | hypoxia inducible factor 1, alpha subunit                                                              | 29560               | 1.55 |
| S100a9                 | S100 calcium binding protein A9 (calgranulin B)                                                        | 94195               | 1.72 |
| Arts1                  | type 1 tumor necrosis factor receptor shedding aminopeptidase regulator                                | 80897               | 1.46 |
| Ppp3cb                 | protein phosphatase 3, catalytic subunit, beta isoform                                                 | 24675               | 1.47 |
| Cxcl1                  | chemokine (C-X-C motif) ligand 1                                                                       | 81503               | 2.24 |
| Rock2                  | Rho-associated coiled-coil containing protein kinase 2                                                 | 25537               | 1.50 |
| Tshr                   | thyroid stimulating hormone receptor                                                                   | 25360               | 1.73 |
| Brca1                  | breast cancer 1                                                                                        | 497672              | 4.07 |
| Bcl2                   | B-cell leukemia/lymphoma 2                                                                             | 24224               | 1.54 |
| Amelx                  | amelogenin X chromosome                                                                                | 29160               | 4.16 |
| Slc4a1                 | solute carrier family 4 (anion exchanger), member 1                                                    | 24779               | 2.19 |
| Casp3                  | caspase 3, apoptosis related cysteine protease                                                         | 25402               | 1.65 |
| Mmp8                   | matrix metallopeptidase 8                                                                              | 63849               | 1.72 |
| Mylpf                  | myosin light chain, phosphorylatable, fast skeletal muscle                                             | 24584               | 4.10 |
| Alox15                 | arachidonate 15-lipoxygenase                                                                           | 81639               | 3.10 |
| Bnip3                  | BCL2/adenovirus E1B 19 kDa-interacting protein 3                                                       | 84480               | 2.20 |
| C1s                    | complement component 1, s subcomponent                                                                 | 192262              | 1.80 |
| Epor                   | erythropoietin receptor                                                                                | 24336               | 3.07 |
| Kitl                   | kit ligand                                                                                             | 60427               | 1.49 |
| Vcan                   | versican                                                                                               | 114122              | 1.72 |
| Vcan                   | versican                                                                                               | 114122              | 1.46 |
| Cxcl12                 | chemokine (C-X-C motif) ligand 12                                                                      | 24772               | 1.90 |
| Cit                    | Citron                                                                                                 | 83620               | 1.81 |
| Olfml2b_predicted      | olfactomedin-like 2B (predicted)                                                                       | 304960              | 1.90 |
| Rom1                   | rod outer segment membrane protein 1                                                                   | 309201              | 1.54 |
| Got2 /// LOC297793 /// | glutamate oxaloacetate transaminase 2, mitochondrial precursor (Transaminase A) ( 25721 /// 297793 //) | 25721 /// 297793 // | 1.51 |
| Olfml2b_predicted      | olfactomedin-like 2B (predicted)                                                                       | 304960              | 2.40 |
| Smc3                   | structural maintenance of chromosomes 3                                                                | 29486               | 2.71 |
| Selp                   | selectin, platelet                                                                                     | 25651               | 1.61 |
| Col8a1_predicted       | procollagen, type VIII, alpha 1 (predicted)                                                            | 304021              | 1.58 |
| Smarca2                | SWI/SNF related, matrix associated, actin dependent regulator of chromatin, subfam                     | 361745              | 1.76 |
| Bmp2                   | bone morphogenetic protein 2                                                                           | 29373               | 3.59 |
| Mmp9                   | matrix metallopeptidase 9                                                                              | 81687               | 1.56 |
| Cbp                    | Csk binding protein                                                                                    | 64019               | 1.56 |
| Trpm7                  | Transient receptor potential-related protein, Chak                                                     | 679906              | 1.86 |
|                        |                                                                                                        |                     | 1.47 |
| Cav2                   | caveolin 2                                                                                             | 363425              | 1.93 |
| Cd86                   | Cd86 antigen                                                                                           | 56822               | 1.47 |
| Mmp14                  | Matrix metallopeptidase 14 (membrane-inserted)                                                         | 81707               | 1.64 |
| Itgb1bp1_predicted     | integrin beta 1 binding protein 1 (predicted)                                                          | 298914              | 3.58 |
| Sh2d1a                 | SH2 domain protein 1A                                                                                  | 501502              | 1.80 |
| LOC306805              | Similar to asporin precursor                                                                           | 306805              | 3.14 |
| Lilrc1                 | leukocyte immunoglobulin-like receptor                                                                 | 691533              | 1.71 |
| RGD1311300             | similar to T cell receptor V delta 6                                                                   | 364378              | 1.47 |
| Tpd52_predicted        | tumor protein D52 (predicted)                                                                          | 294900              | 1.69 |
| Matr3                  | matrin 3                                                                                               | 29150               | 1.70 |
| Blm_predicted          | Bloom syndrome homolog (human) (predicted)                                                             | 308755              | 2.40 |
| Cttnbp2                | cortactin binding protein 2                                                                            | 282587              | 1.57 |
| Fndc3a_predicted       | fibronectin type III domain containing 3a (predicted)                                                  | 306022              | 2.18 |
| Traf6_predicted        | Tnf receptor-associated factor 6 (predicted)                                                           | 311245              | 1.55 |
| Nusap1_predicted       | nucleolar and spindle associated protein 1 (predicted)                                                 | 311336              | 1.65 |
| Smarca1_predicted      | SWI/SNF related, matrix associated, actin dependent regulator of chromatin, subfam                     | 317575              | 2.33 |

|                            |                                                                            |                   |       |
|----------------------------|----------------------------------------------------------------------------|-------------------|-------|
| C6                         | complement component 6                                                     | 24237             | 3.15  |
| Cxadr                      | coxsackie virus and adenovirus receptor                                    | 89843             | 18.84 |
| Runx1t1                    | runx-related transcription factor 1; translocated to, 1 (cyclin D-related) | 362489            | 2.22  |
| LOC685468 /// Noc3l        | nucleolar complex associated 3 homolog (S. cerevisiae)                     | 361753 /// 685468 | 1.95  |
| Steap4                     | STEAP family member 4                                                      | 499991            | 1.79  |
| Dsel                       | dermatan sulfate epimerase-like                                            | 297865            | 1.68  |
| Kin                        | antigenic determinant of rec-A protein                                     | 689197            | 2.03  |
| Exo1_predicted             | exonuclease 1 (predicted)                                                  | 305000            | 1.57  |
| Asz1 /// Cav1 /// Cav2 /// | met proto-oncogene /// caveolin, caveolae protein 1                        | 114487 /// 170578 | 2.68  |
| Ilgav_predicted            | integrin alpha V (predicted)                                               | 296456            | 1.52  |
| Asz1 /// Cav1 /// Cav2 /// | met proto-oncogene of tumorigenicity 7 /// caveolin 2                      | 114487 /// 170578 | 3.96  |
| Zcchc11_predicted          | zinc finger, CCHC domain containing 11 (predicted)                         | 313481            | 1.61  |
| Zeb2                       | zinc finger E-box binding homeobox 2                                       | 311071            | 1.63  |
| Pcdh8                      | Protocadherin 8                                                            | 64865             | 4.45  |
| Cdh11                      | cadherin 11                                                                | 84407             | 2.02  |
| Mcts2                      | malignant T cell amplified sequence 2                                      | 689500            | 1.49  |
| Hist1h2bc /// Hist1h2bh    | histone cluster 1, H2b /// histone cluster 1,                              | 306945 /// 361247 | 1.83  |
| Il22ra2                    | interleukin 22 receptor, alpha 2                                           | 444986            | 1.86  |
| Pcdhb22                    | protocadherin beta 22                                                      | 307486            | 1.65  |
| Tgfb2                      | Transforming growth factor, beta 2                                         | 81809             | 1.47  |
| Zeb2                       | zinc finger E-box binding homeobox 2                                       | 311071            | 1.49  |
| Cbl1_predicted             | Casitas B-lineage lymphoma-like 1 (predicted)                              | 314028            | 1.48  |
| Yars2                      | tyrosyl-tRNA synthetase 2 (mitochondrial)                                  | 287924            | 1.77  |
| Rasa1                      | RAS p21 protein activator 1                                                | 25676             | 1.74  |
| Prss32_predicted           | protease, serine, 32 (predicted)                                           | 302970            | 4.34  |
|                            | Transcribed locus                                                          |                   | 2.68  |
| Iitga6                     | Integrin, alpha 6                                                          | 114517            | 1.70  |
| Camp                       | cathelicidin antimicrobial peptide                                         | 316010            | 1.65  |
| Blnk                       | B-cell linker                                                              | 499356            | 1.74  |
| Pcdha12                    | protocadherin alpha 12                                                     | 116779            | 11.30 |
| Matn3_predicted            | Matrilin 3 (predicted)                                                     | 313954            | 7.60  |
| Eln                        | elastin                                                                    | 25043             | 1.83  |
| Lama4                      | laminin, alpha 4                                                           | 309816            | 1.76  |
| Ndufa9                     | NADH dehydrogenase (ubiquinone) 1 alpha subcomplex, 9                      | 362440            | 2.48  |
|                            |                                                                            |                   | 10.79 |
| Apb2                       | amyloid beta (A4) precursor protein-binding, family B, member 2            | 305338            | 3.18  |
| Ttyh1_predicted            | tweety homolog 1 (Drosophila) (predicted)                                  | 292597            | 8.35  |
| Tia1                       | cytotoxic granule-associated RNA binding protein 1                         | 312510            | 2.31  |
| Nlgn2                      | neuroligin 2                                                               | 117096            | 1.53  |
