# Supplementary material
Source: PubMed Central journal article supplement (PMC2742800)
Supplement: 90591.2008_4.pdf [file 90591.2008_4.pdf]

Supplement Table 3: Inflammatory genes whose expression in 3d hypoxia is equal to or greater than 1.5 fold compared to normoxia in lungs. Analysis was performed using@Genespring 10.0 Software.

| Gene Symbol                       | Gene Title                                                                  | Entrez Gene | Fold Increase |
|-----------------------------------|-----------------------------------------------------------------------------|-------------|---------------|
| Spp1                              | secreted phosphoprotein 1                                                   | 25353       | 4.08          |
| Timp1                             | tissue inhibitor of metalloproteinase 1                                     | 116510      | 1.46          |
| Trp53                             | transformation related protein 53                                           | 24842       | 1.55          |
| Gp1bb /// Sept5                   | glycoprotein Ib, beta polypeptid                                            | 116727      | 1.86          |
| Gap43                             | growth associated protein 43                                                | 29423       | 1.57          |
| Ccl2                              | chemokine (C-C motif) ligand 2                                              | 24770       | 3.07          |
| Alas2                             | aminolevulinic acid synthase 2, erythroid                                   | 25748       | 6.19          |
| Prph                              | peripherin                                                                  | 24688       | 2.89          |
| Scg2                              | secretogranin II                                                            | 24765       | 2.69          |
| Gpnmb                             | glycoprotein (transmembrane) nmb                                            | 113955      | 1.46          |
| Adamts1                           | a disintegrin-like and metallopeptidase (                                   | 79252       | 2.15          |
| Serpina3n                         | serine (or cysteine) peptidase inhibitor, clade A, member 3N                | 24795       | 7.70          |
| Hspa1a /// Hspa1b                 | heat shock 70kD protein 1A                                                  | 24472       | 1.63          |
| Hnt                               | neurotrimin                                                                 | 50864       | 2.20          |
| Fabp4                             | fatty acid binding protein 4, adipocyte                                     | 79451       | 2.22          |
| Ltbp2                             | latent transforming growth factor beta binding protein 2                    | 59106       | 1.91          |
| Serpinb2                          | serine (or cysteine) peptidase inhibitor, clade B, member 2                 | 60325       | 1.83          |
| Serpine1                          | serine (or cysteine) peptidase inhibitor, clade E, member 1                 | 24617       | 3.66          |
| Mmp12                             | matrix metallopeptidase 12                                                  | 117033      | 2.27          |
| Emb                               | embigin                                                                     | 114511      | 2.17          |
| Add2                              | adducin 2 (beta)                                                            | 24171       | 22.11         |
| Cspg4                             | chondroitin sulfate proteoglycan 4                                          | 81651       | 1.92          |
| Lta                               | lymphotoxin A                                                               | 25008       | 3.27          |
| Fbn1                              | fibrillin 1                                                                 | 83727       | 1.55          |
| Bmp2                              | bone morphogenetic protein 2                                                | 29373       | 7.89          |
| Timp3                             | tissue inhibitor of metalloproteinase 3                                     | 25358       | 1.56          |
| Prkcc                             | protein kinase C, gamma                                                     | 24681       | 2.50          |
| Reln                              | reelin                                                                      | 24718       | 3.27          |
| Grem1                             | gremlin 1                                                                   | 50566       | 5.01          |
| Il13ra2                           | interleukin 13 receptor, alpha 2                                            | 171060      | 1.79          |
| Selp                              | selectin, platelet                                                          | 25651       | 1.98          |
| Ms4a2                             | membrane-spanning 4-domains, subfamily A, member 2                          | 25316       | 1.50          |
| Cdh13                             | cadherin 13                                                                 | 192248      | 2.65          |
| Slc7a2                            | solute carrier family 7 (cationic amino acid transporter, y+ system), membe | 64554       | 2.98          |
| Slc4a1                            | solute carrier family 4 (anion exchanger), member 1                         | 24779       | 13.56         |
| Thy1                              | thymus cell antigen 1, theta                                                | 24832       | 1.54          |
| Cebpa                             | CCAAT/enhancer binding protein (C/EBP), alpha                               | 24252       | 2.33          |
| Scn3a                             | sodium channel, voltage-gated, type III, alpha                              | 497770      | 2.29          |
| F13a1                             | coagulation factor XIII, A1 subunit                                         | 60327       | 3.90          |
| Gas6                              | growth arrest specific 6                                                    | 58935       | 1.54          |
| Mcam                              | melanoma cell adhesion molecule                                             | 78967       | 1.55          |
| Ada                               | adenosine deaminase                                                         | 24165       | 1.78          |
| Hmox1                             | heme oxygenase (decycling) 1                                                | 24451       | 1.62          |
| C1qb                              | complement component 1, q subcomponent, beta polypeptide                    | 29687       | 3.76          |
| Srprb /// Trf                     | transferrin ///                                                             | 24825       | 2.33          |
| RT1-CE16                          | RT1 class I, CE16                                                           | 414819      | 1.47          |
| Ppbb                              | pro-platelet basic protein                                                  | 246358      | 19.60         |
| Cdh6                              | cadherin 6                                                                  | 25409       | 7.54          |
| Il1r1                             | interleukin 1 receptor, type I                                              | 25663       | 1.86          |
| Prlr                              | prolactin receptor                                                          | 24684       | 3.33          |
| Fntb                              | farnesyltransferase, CAAX box, beta                                         | 64511       | 2.27          |
| Rsad2                             | radical S-adenosyl methionine domain containing 2                           | 65190       | 4.50          |
| Itga7                             | integrin alpha 7                                                            | 81008       | 1.69          |
| Il6st                             | interleukin 6 signal transducer                                             | 25205       | 1.74          |
| Lamc1                             | laminin, gamma 1                                                            | 117036      | 1.51          |
| Jag2                              | jagged 2                                                                    | 29147       | 2.33          |
| Nrcam                             | neuron-glia-CAM-related cell adhesion molecule                              | 497815      | 1.60          |
| Ptprf                             | protein tyrosine phosphatase, receptor type, F                              | 360406      | 1.61          |
| Itga6                             | integrin, alpha 6                                                           | 114517      | 1.64          |
| Tnfaip6                           | tumor necrosis factor alpha induced protein 6                               | 84397       | 2.71          |
| Sqstm1                            | sequestosome 1                                                              | 113894      | 1.66          |
| Csf2                              | colony stimulating factor 2 (granulocyte-macrophage)                        | 116630      | 1.84          |
| Vcan                              | versican                                                                    | 114122      | 2.17          |
| Pf4                               | platelet factor 4                                                           | 360918      | 1.94          |
| Igfbp4                            | insulin-like growth factor binding protein 4                                | 360622      | 1.54          |
| Smardc3                           | SWI/SNF related, matrix associated, actin dependent regulator of chromati   | 296732      | 1.47          |
| Gpr56                             | G protein-coupled receptor 56                                               | 260326      | 2.12          |
| Ak3l1                             | adenylate kinase 3-like 1                                                   | 29223       | 1.88          |
| Emcn                              | endomucin                                                                   | 295490      | 1.48          |
| C1qc                              | complement component 1, q subcomponent, C chain                             | 362634      | 2.30          |
| Mustn1                            | musculoskeletal, embryonic nuclear protein 1                                | 290553      | 2.15          |
| Col4a1 /// Col4a2_predicted       | procollagen, type IV, alpha 1                                               | 290905      | 1.56          |
| Anln                              | anillin, actin binding protein (scraps homolog, Drosophila)                 | 307056      | 1.62          |
| Cxd9                              | chemokine (C-X-C motif) ligand 9                                            | 246759      | 1.50          |
| Racgap1_predicted                 | Rac GTPase-activating protein 1 (predicted)                                 | 315298      | 1.62          |
| Reln                              | reelin                                                                      | 24718       | 2.46          |
| Bat4 /// C2 /// C4a /// Cfb /// C | complement component 2 akinase 19                                           | 24231       | 1.50          |
| Ceacam1                           | cerebral endothelial cell adhesion molecule 1                               | 296616      | 1.56          |
| F13a1                             | coagulation factor XIII, A1 subunit                                         | 60327       | 6.11          |
| Cpxm2_predicted                   | carboxypeptidase X 2 (M14 family) (predicted)                               | 293566      | 2.81          |
| Wnt5b                             | wingless-related MMTV integration site 5B                                   | 282582      | 2.03          |
| Cdh13                             | cadherin 13                                                                 | 192248      | 1.68          |
| Cldn2_predicted                   | claudin 2 (predicted)                                                       | 300920      | 16.96         |
| Dsc2                              | desmocollin 2                                                               | 291760      | 1.53          |

|                                   |                                                                            |        |       |
|-----------------------------------|----------------------------------------------------------------------------|--------|-------|
| C1qa                              | complement component 1, q subcomponent, alpha polypeptide                  | 298566 | 2.77  |
| Tfpi2                             | tissue factor pathway inhibitor 2                                          | 286926 | 1.97  |
| Hrc                               | histidine rich calcium binding protein                                     | 292905 | 2.26  |
| Chia                              | chitinase, acidic                                                          | 113901 | 4.07  |
| Cmtm2a                            | CKLF-like MARVEL transmembrane domain containing 2A                        | 307616 | 2.30  |
| Aspn                              | asporin                                                                    | 306805 | 1.65  |
| Ca2                               | carbonic anhydrase 2                                                       | 54231  | 2.96  |
| Plip                              | plasma membrane proteolipid                                                | 64364  | 1.68  |
| Lpl                               | lipoprotein lipase                                                         | 24539  | 1.50  |
| Kng1 /// Kng2 /// MGC108747       | kininogen 1 /// kininogen 2                                                | 24903  | 1.51  |
| Npy                               | neuropeptide Y                                                             | 24604  | 1.61  |
| Ina                               | internexin neuronal intermediate filament protein, alpha                   | 24503  | 1.49  |
| Azgp1                             | alpha-2-glycoprotein 1, zinc                                               | 25294  | 1.50  |
| Mepe                              | matrix extracellular phosphoglycoprotein with ASARM motif (bone)           | 79110  | 7.89  |
| Acan                              | aggrecan                                                                   | 58968  | 1.78  |
| Cdkn1a                            | cyclin-dependent kinase inhibitor 1A                                       | 114851 | 2.27  |
| Ptprk                             | protein tyrosine phosphatase, receptor type, K, extracellular region       | 360302 | 1.52  |
| Ncf1                              | neutrophil cytosolic factor 1                                              | 114553 | 1.56  |
| Pnliprp2                          | pancreatic lipase-related protein 2                                        | 117554 | 1.99  |
| Slc4a1                            | solute carrier family 4 (anion exchanger), member 1                        | 24779  | 21.08 |
| Nos2                              | nitric oxide synthase 2, inducible                                         | 24599  | 1.97  |
| Sstr1                             | somatostatin receptor 1                                                    | 25033  | 1.55  |
| Id3                               | inhibitor of DNA binding 3                                                 | 25585  | 1.64  |
| Agt                               | angiotensinogen (serpin peptidase inhibitor, clade A, member 8)            | 24179  | 1.46  |
| Lbp                               | lipopolysaccharide binding protein                                         | 29469  | 1.66  |
| C1s                               | complement component 1, s subcomponent                                     | 192262 | 1.55  |
| Vcan                              | versican                                                                   | 114122 | 2.40  |
| Vcan                              | versican                                                                   | 114122 | 1.54  |
| Acot2                             | acyl-CoA thioesterase 2                                                    | 192272 | 1.68  |
| Jub                               | ajuba                                                                      | 85265  | 1.89  |
| Irga7                             | integrin alpha 7                                                           | 81008  | 1.89  |
| Vcan                              | versican                                                                   | 114122 | 1.68  |
| Col4a2_predicted                  | procollagen, type IV, alpha 2 (predicted)                                  | 306628 | 1.59  |
| Cxcl12                            | chemokine (C-X-C motif) ligand 12                                          | 24772  | 3.14  |
| Cfd                               | complement factor D (adipsin)                                              | 54249  | 1.67  |
| Col15a1                           | collagen, type XV, alpha 1                                                 | 298069 | 1.78  |
| Astn1                             | astrotactin 1                                                              | 304900 | 1.98  |
| Cit                               | Citron                                                                     | 83620  | 1.47  |
| Olfml2b_predicted                 | olfactomedin-like 2B (predicted)                                           | 304960 | 2.01  |
| Ank1                              | ankyrin 1, erythroid                                                       | 306570 | 1.46  |
| Ager /// Agpat1 /// Btnl7 /// Btr | advanced glycosylation end product-specific receptor                       | 406159 | 1.61  |
| Cadm3                             | cell adhesion molecule 3                                                   | 360882 | 3.72  |
| Olfml2b_predicted                 | olfactomedin-like 2B (predicted)                                           | 304960 | 1.80  |
| Selp                              | selectin, platelet                                                         | 25651  | 1.71  |
| Col8a1_predicted                  | procollagen, type VIII, alpha 1 (predicted)                                | 304021 | 1.65  |
| Mog /// Olr1735_predicted ///     | myelin oligodendrocyte glycoprotein                                        | 24558  | 1.63  |
| Bmp2                              | bone morphogenetic protein 2                                               | 29373  | 8.58  |
| Vwa1                              | von Willebrand factor A domain containing 1                                | 298683 | 4.33  |
| Srrm1_predicted                   | serine/arginine repetitive matrix 1 (predicted)                            | 313620 | 1.67  |
| Ccl21b                            | chemokine (C-C motif) ligand 21b (serine)                                  | 298006 | 1.80  |
| Col15a1                           | collagen, type XV, alpha 1                                                 | 298069 | 1.91  |
| Hps5 /// Saa4                     | serum amyloid A 4                                                          | 308598 | 2.70  |
| Lingo4 /// Rorc                   | RAR-related orphan receptor C /// leucine rich repeat and Ig domain contai | 368158 | 1.91  |
| Alox12_predicted                  | arachidonate 12-lipoxygenase (predicted)                                   | 287454 | 1.77  |
| LOC306805                         | Similar to asporin precursor                                               | 306805 | 1.65  |
| Anxa9                             | annexin A9                                                                 | 689830 | 1.58  |
| Mmp23                             | matrix metalloproteinase 23                                                | 94339  | 1.58  |
| Rnd1                              | Rho family GTPase 1                                                        | 362993 | 1.46  |
| Clecsf6                           | C-type (calcium dependent, carbohydrate recognition domain) lectin, super  | 474143 | 2.95  |
| Cttnbp2                           | cortactin binding protein 2                                                | 282587 | 1.64  |
| Ptprk                             | protein tyrosine phosphatase,                                              | 360302 | 1.47  |
| Elk3_predicted                    | ELK3, member of ETS oncogene family (predicted)                            | 362871 | 1.89  |
| C6                                | complement component 6                                                     | 24237  | 4.67  |
| Ccl24                             | chemokine (C-C motif) ligand 24                                            | 288593 | 2.18  |
| Pcdh8                             | Protocadherin 8                                                            | 64865  | 2.51  |
| Notch1                            | Notch gene homolog 1 (Drosophila)                                          | 25496  | 2.00  |
| Ccl9                              | chemokine (C-C motif) ligand 9                                             | 360579 | 1.78  |
| Serpine1                          | serine (or cysteine) peptidase inhibitor,                                  | 24617  | 4.47  |
| Mmp23                             | matrix metalloproteinase 23                                                | 94339  | 1.56  |
| Pex16                             | peroxisome biogenesis factor 16                                            | 311203 | 1.85  |
| LOC687992                         | similar to Serum amyloid A-3 protein precursor                             | 687992 | 2.06  |
| Yars2                             | tyrosyl-tRNA synthetase 2 (mitochondrial)                                  | 287924 | 1.48  |
| Pcdha12                           | protocadherin alpha 12                                                     | 116779 | 1.57  |
| Dmp1                              | dentin matrix protein 1                                                    | 25312  | 1.72  |
| Tnfrsf11a_predicted               | Tumor necrosis factor receptor s                                           | 498206 | 1.90  |
| Aebp1_predicted                   | AE binding protein 1 (predicted)                                           | 305494 | 1.50  |
| Lama5                             | laminin, alpha 5                                                           | 140433 | 1.54  |
| Frem3                             | Fras1 related extracellular matrix protein 3                               | 307767 | 9.64  |
